# Supplementary material for: Using host traits to predict reservoir host species of rabies virus
Source: PubMed Central journal article supplement (PMC7748407; doi:10.1371/journal.pntd.0008940), 2020-12-08
Supplement: pntd.0008940.s001.pdf [file pntd.0008940.s001.pdf]

**S1 Table. Model performance**

| <b>Model</b>                   | <b>Accuracy</b> | <b>Specificity</b> | <b>Sensitivity</b> |
|--------------------------------|-----------------|--------------------|--------------------|
| Carnivore - conservative model | 67.16           | 67.07              | 75.79              |
| Carnivore - liberal model      | 65.89           | 65.84              | 70.0               |
| Bat - conservative model       | 82.59           | 82.57              | 83.75              |
| Bat - liberal model            | 82.41           | 82.32              | 87.58              |
