# Supplementary material for: Using host traits to predict reservoir host species of rabies virus
Source: PubMed Central journal article supplement (PMC7748407; doi:10.1371/journal.pntd.0008940), 2020-12-08
Supplement: pntd.0008940.s002.pdf [file pntd.0008940.s002.pdf]

**S2 Table. Carnivore species predicted to be RABV reservoirs based on the liberal criteria.** Since there is inherent variation when performing permutations, species with Shapley values close to zero (especially those < 0.1) should be considered with caution.

| <b>Species</b>                                           | <b>Family</b> | <b>Shapley value</b> |
|----------------------------------------------------------|---------------|----------------------|
| Fennec fox ( <i>Vulpes zerda</i> )                       | Canidae       | 0.30                 |
| Swift fox ( <i>Vulpes velox</i> )                        | Canidae       | 0.28                 |
| Culpeo ( <i>Lycalopex culpaeus</i> )                     | Canidae       | 0.24                 |
| African civet ( <i>Civettictis civetta</i> )             | Viverridae    | 0.14                 |
| Long-tailed weasel ( <i>Mustela frenata</i> )            | Mustelidae    | 0.22                 |
| Cape fox ( <i>Vulpes chama</i> )                         | Canidae       | 0.21                 |
| Island fox ( <i>Urocyon littoralis</i> )                 | Canidae       | 0.2                  |
| Ring-tailed cat ( <i>Bassariscus astutus</i> )           | Procyonidae   | 0.2                  |
| Steppe polecat ( <i>Mustela eversmannii</i> )            | Mustelidae    | 0.2                  |
| Dhole ( <i>Cuon alpinus</i> )                            | Canidae       | 0.43                 |
| Bush dog ( <i>Speothos venaticus</i> )                   | Canidae       | 0.18                 |
| Pampas fox ( <i>Lycalopex gymnocercus</i> )              | Canidae       | 0.17                 |
| Common kusimanse ( <i>Crossarchus obscurus</i> )         | Herpestidae   | 0.15                 |
| Maned wolf ( <i>Chrysocyon brachyurus</i> )              | Canidae       | 0.14                 |
| Stoat ( <i>Mustela erminea</i> )                         | Mustelidae    | 0.14                 |
| Indian grey mongoose ( <i>Herpestes edwardsi</i> )       | Herpestidae   | 0.12                 |
| Least weasel ( <i>Mustela nivalis</i> )                  | Mustelidae    | 0.12                 |
| Striped hyena ( <i>Hyaena hyaena</i> )                   | Hyaenidae     | 0.12                 |
| Kit fox ( <i>Vulpes macrotis</i> )                       | Canidae       | 0.11                 |
| African wild dog ( <i>Lycan pictus</i> )                 | Canidae       | 0.11                 |
| Tibetan sand fox ( <i>Vulpes ferrilata</i> )             | Canidae       | 0.1                  |
| Banded mongoose ( <i>Mungos mungo</i> )                  | Herpestidae   | 0.09                 |
| Striped polecat ( <i>Ictonyx striatus</i> )              | Mustelidae    | 0.09                 |
| Wildcat ( <i>Felis silvestris</i> )                      | Felidae       | 0.08                 |
| Honey badger ( <i>Mellivora capensis</i> )               | Mustelidae    | 0.07                 |
| Egyptian mongoose ( <i>Herpestes ichneumon</i> )         | Herpestidae   | 0.07                 |
| Common genet ( <i>Genetta genetta</i> )                  | Viverridae    | 0.07                 |
| Pygmy spotted skunk ( <i>Spilogale pygmaea</i> )         | Mephitidae    | 0.06                 |
| Bengal fox ( <i>Vulpes bengalensis</i> )                 | Canidae       | 0.06                 |
| Brown bear ( <i>Ursus arctos</i> )                       | Ursidae       | 0.05                 |
| African clawless otter ( <i>Aonyx capensis</i> )         | Mustelidae    | 0.05                 |
| Pale fox ( <i>Vulpes pallida</i> )                       | Canidae       | 0.04                 |
| American hog-nosed skunk ( <i>Conepatus leuconotus</i> ) | Mephitidae    | 0.04                 |
| European polecat ( <i>Mustela putorius</i> )             | Mustelidae    | 0.03                 |
| Brown palm civet ( <i>Paradoxurus jerdoni</i> )          | Viverridae    | 0.03                 |
| Blandford's fox ( <i>Vulpes cana</i> )                   | Canidae       | 0.03                 |
| Malabar large-spotted civet ( <i>Viverra civettina</i> ) | Viverridae    | 0.03                 |
| Crab-eating raccoon ( <i>Procyon cancrivorus</i> )       | Procyonidae   | 0.02                 |
| American badger ( <i>Taxidea taxus</i> )                 | Mustelidae    | 0.01                 |
