# Supplementary material for: Using host traits to predict reservoir host species of rabies virus
Source: PubMed Central journal article supplement (PMC7748407; doi:10.1371/journal.pntd.0008940), 2020-12-08
Supplement: pntd.0008940.s003.pdf [file pntd.0008940.s003.pdf]

**S3 Table. Bat species predicted to be RABV reservoirs based on the liberal criteria.** Since there is inherent variation when performing permutations, species with Shapley values close to zero (especially those < 0.1) should be considered with caution.

| <b>Species</b>                                                  | <b>Family</b>    | <b>Shapley value</b> |
|-----------------------------------------------------------------|------------------|----------------------|
| Long-legged myotis ( <i>Myotis volans</i> )                     | Vespertilionidae | 0.38                 |
| Riparian myotis ( <i>Myotis riparius</i> )                      | Vespertilionidae | 0.38                 |
| Western mastiff bat ( <i>Eumops perotis</i> )                   | Molossidae       | 0.36                 |
| Big free-tailed bat ( <i>Nyctinomops macrotis</i> )             | Molossidae       | 0.36                 |
| Spotted bat ( <i>Euderma maculatum</i> )                        | Vespertilionidae | 0.36                 |
| Dwarf bonneted bat ( <i>Eumops bonariensis</i> )                | Molossidae       | 0.33                 |
| Little yellow-shouldered bat ( <i>Sturnira lilium</i> )         | Phyllostomidae   | 0.32                 |
| Armenian whiskered bat ( <i>Myotis hajastanicus</i> )           | Vespertilionidae | 0.31                 |
| Dark-nosed small-footed myotis ( <i>Myotis melanorhinus</i> )   | Vespertilionidae | 0.29                 |
| Greater bulldog bat ( <i>Noctilio leporinus</i> )               | Noctilionidae    | 0.29                 |
| Pallas's long-tongued bat ( <i>Glossophaga soricina</i> )       | Phyllostomidae   | 0.28                 |
| Indiana bat ( <i>Myotis sodalis</i> )                           | Vespertilionidae | 0.43                 |
| Eastern small-footed myotis ( <i>Myotis leibii</i> )            | Vespertilionidae | 0.24                 |
| Northern long-eared myotis ( <i>Myotis septentrionalis</i> )    | Vespertilionidae | 0.24                 |
| Gray bat ( <i>Myotis grisescens</i> )                           | Vespertilionidae | 0.22                 |
| Rafinesque's big-eared bat ( <i>Corynorhinus rafinesquii</i> )  | Vespertilionidae | 0.12                 |
| Yellowish myotis ( <i>Myotis levis</i> )                        | Vespertilionidae | 0.11                 |
| Southwestern myotis ( <i>Myotis auricolus</i> )                 | Vespertilionidae | 0.1                  |
| Allen's big-eared bat ( <i>Idionycteris phyllotis</i> )         | Vespertilionidae | 0.09                 |
| White-throated round-eared bat ( <i>Lophostoma silvicolum</i> ) | Phyllostomidae   | 0.09                 |
| Atacama myotis ( <i>Myotis atacamensis</i> )                    | Vespertilionidae | 0.09                 |
| California leaf-nosed bat ( <i>Macrotus californicus</i> )      | Phyllostomidae   | 0.07                 |
| Southern myotis ( <i>Myotis aelleni</i> )                       | Vespertilionidae | 0.06                 |
| Southern big-eared brown bat ( <i>Histiotus magellanicus</i> )  | Vespertilionidae | 0.06                 |
| White-winged vampire bat ( <i>Diaemus youngi</i> )              | Phyllostomidae   | 0.04                 |
| Little yellow bat ( <i>Rhogeessa parvula</i> )                  | Vespertilionidae | 0.03                 |
| Sinaloan mastiff bat ( <i>Molossus sinaloae</i> )               | Molossidae       | 0.03                 |
| Thomas's big-eared brown bat ( <i>Histiotus laephotis</i> )     | Vespertilionidae | 0.02                 |
| Black-winged little yellow bat ( <i>Rhogeessa tumida</i> )      | Vespertilionidae | 0.02                 |
| Handley's tailless bat ( <i>Anoura cultrata</i> )               | Phyllostomidae   | 0.02                 |
| Myotis vivesi ( <i>Myotis vivesi</i> )                          | Vespertilionidae | 0.02                 |
| Long-legged bat ( <i>Macrophyllum macrophyllum</i> )            | Phyllostomidae   | 0.01                 |
| Guianan spear-nosed bat ( <i>Phyllostomus latifolius</i> )      | Phyllostomidae   | 0.01                 |
| Pocketed free-tailed bat ( <i>Nyctinomops femorosaccus</i> )    | Molossidae       | 0.01                 |
